# Supplementary material for: An evaluation of the metabolic syndrome in the HyperGEN study
Source: PubMed Central journal article supplement (PMC549210; doi:10.1186/1743-7075-2-2), 2005-01-18
Supplement: 1743-7075-2-2-S1.pdf [file 1743-7075-2-2-S1.pdf]

**Table 4. Factor Loadings Result of FA with and without Rotation Performed on 11 Risk Factors**

| Rotation="None"        | Blacks: All Data |             |             |              | Blacks: Excluding T2D |             |             |              | Rotation="Varimax"     | Blacks: All Data |             |              |             | Blacks: Excluding T2D |             |              |             |
|------------------------|------------------|-------------|-------------|--------------|-----------------------|-------------|-------------|--------------|------------------------|------------------|-------------|--------------|-------------|-----------------------|-------------|--------------|-------------|
|                        | Factor 1         | Factor 2    | Factor 3    | Factor 4     | Factor 1              | Factor 2    | Factor 3    | Factor 4     |                        | Factor 1         | Factor 2    | Factor 3     | Factor 4    | Factor 1              | Factor 2    | Factor 3     | Factor 4    |
| Proportion of Variance | <b>0.21</b>      | <b>0.17</b> | <b>0.14</b> | <b>0.08</b>  | <b>0.21</b>           | <b>0.17</b> | <b>0.15</b> | <b>0.08</b>  | Proportion of Variance | <b>0.23</b>      | <b>0.14</b> | <b>0.14</b>  | <b>0.09</b> | <b>0.23</b>           | <b>0.15</b> | <b>0.14</b>  | <b>0.09</b> |
| Cumulative Variance    | <b>0.21</b>      | <b>0.38</b> | <b>0.52</b> | <b>0.60</b>  | <b>0.21</b>           | <b>0.38</b> | <b>0.52</b> | <b>0.60</b>  | Cumulative Variance    | <b>0.23</b>      | <b>0.37</b> | <b>0.51</b>  | <b>0.60</b> | <b>0.23</b>           | <b>0.37</b> | <b>0.51</b>  | <b>0.61</b> |
| Loadings: BMI†         | <b>0.45†</b>     | <b>0.86</b> | 0.13        |              | <b>0.48</b>           | <b>0.84</b> | 0.16        |              | Loadings: BMI          | <b>0.95</b>      |             | 0.22         |             | <b>0.95</b>           |             | 0.23         |             |
| INS                    | <b>0.42</b>      | 0.39        |             | 0.37         | <b>0.45</b>           | <b>0.42</b> |             | <b>0.43</b>  | INS                    | <b>0.42</b>      |             | <b>0.52</b>  | 0.15        | <b>0.44</b>           |             | <b>0.58</b>  | 0.15        |
| GLUC†                  | 0.31             | -0.18       |             | -0.34        | -0.26                 | -0.24       |             | -0.38        | GLUC                   | -0.20            |             | <b>-0.43</b> | -0.12       | -0.22                 |             | <b>-0.47</b> |             |
| LDL                    | 0.12             |             |             | 0.24         | 0.12                  | 0.11        |             | 0.28         | LDL                    |                  |             | 0.27         |             |                       |             | 0.31         |             |
| HDL                    | -0.27            | -0.13       |             | <b>-0.50</b> | -0.28                 | -0.14       |             | <b>-0.47</b> | HDL                    |                  |             | <b>-0.57</b> |             | -0.12                 |             | <b>-0.54</b> | -0.10       |
| TG                     | 0.31             |             |             | <b>0.57</b>  | 0.28                  |             |             | <b>0.51</b>  | TG                     |                  |             | <b>0.64</b>  | 0.11        |                       |             | <b>0.57</b>  | 0.12        |
| SBP                    | 0.14             |             | <b>0.99</b> |              | 0.15                  |             |             | <b>0.99</b>  | SBP                    | 0.13             | <b>0.99</b> |              |             | 0.15                  | <b>0.99</b> |              |             |
| DBP                    |                  | -0.15       | <b>0.75</b> |              |                       |             | -0.19       | <b>0.76</b>  | DBP                    |                  | <b>0.76</b> |              |             |                       | <b>0.78</b> |              |             |
| WAIST                  | <b>0.70</b>      | <b>0.67</b> |             |              | <b>0.73</b>           | <b>0.65</b> |             |              | WAIST                  | <b>0.86</b>      |             | 0.24         | <b>0.40</b> | <b>0.86</b>           |             | 0.24         | <b>0.40</b> |
| WHR                    | <b>1.00</b>      |             |             |              | <b>1.00</b>           |             |             |              | WHR                    | 0.32             |             | 0.31         | <b>0.90</b> | 0.32                  |             | 0.28         | <b>0.90</b> |
| %BF                    | 0.33             | <b>0.65</b> |             |              | 0.35                  | <b>0.63</b> |             |              | %BF                    | <b>0.71</b>      |             | 0.19         |             | <b>0.70</b>           |             | 0.20         |             |

  

| Rotation="None"        | Whites: All Data |             |              |             | Whites: Excluding T2D |             |             |              | Rotation="Varimax"     | Whites: All Data |              |              |             | Whites: Excluding T2D |             |              |             |
|------------------------|------------------|-------------|--------------|-------------|-----------------------|-------------|-------------|--------------|------------------------|------------------|--------------|--------------|-------------|-----------------------|-------------|--------------|-------------|
|                        | Factor 1         | Factor 2    | Factor 3     | Factor 4    | Factor 1              | Factor 2    | Factor 3    | Factor 4     |                        | Factor 1         | Factor 2     | Factor 3     | Factor 4    | Factor 1              | Factor 2    | Factor 3     | Factor 4    |
| Proportion of Variance | <b>0.32</b>      | <b>0.12</b> | <b>0.09</b>  | <b>0.04</b> | <b>0.22</b>           | <b>0.18</b> | <b>0.12</b> | <b>0.08</b>  | Proportion of Variance | <b>0.25</b>      | <b>0.13</b>  | <b>0.13</b>  | <b>0.07</b> | <b>0.25</b>           | <b>0.13</b> | <b>0.12</b>  | <b>0.09</b> |
| Cumulative Variance    | <b>0.32</b>      | <b>0.44</b> | <b>0.53</b>  | <b>0.57</b> | <b>0.22</b>           | <b>0.39</b> | <b>0.51</b> | <b>0.59</b>  | Cumulative Variance    | <b>0.25</b>      | <b>0.37</b>  | <b>0.50</b>  | <b>0.57</b> | <b>0.25</b>           | <b>0.38</b> | <b>0.50</b>  | <b>0.59</b> |
| Loadings: BMI          | <b>0.90</b>      | 0.14        |              | -0.36       | <b>0.50</b>           | <b>0.82</b> |             |              | Loadings: BMI          | <b>0.94</b>      | 0.23         |              |             | <b>0.93</b>           |             | 0.22         |             |
| INS                    | <b>0.54</b>      | 0.19        | 0.37         | -0.15       | <b>0.40</b>           | <b>0.46</b> |             | 0.35         | INS                    | <b>0.46</b>      | <b>0.51</b>  | 0.13         |             | <b>0.48</b>           | 0.15        | <b>0.49</b>  |             |
| GLUC                   | -0.33            |             | -0.19        |             | -0.23                 | -0.20       |             | -0.13        | GLUC                   | -0.26            | -0.27        | <b>-0.28</b> | -0.10       | -0.23                 |             | -0.20        |             |
| LDL                    |                  |             |              |             | 0.10                  |             |             |              | LDL                    |                  |              |              |             |                       |             | 0.13         |             |
| HDL                    | -0.25            |             | <b>-0.64</b> |             | -0.23                 | -0.16       |             | <b>-0.62</b> | HDL                    | -0.11            | <b>-0.68</b> |              |             | -0.12                 |             | <b>-0.67</b> |             |
| TG                     | 0.28             | 0.14        | <b>0.58</b>  |             | 0.27                  | 0.18        |             | <b>0.56</b>  | TG                     | 0.11             | <b>0.64</b>  |              |             | 0.14                  |             | <b>0.63</b>  |             |
| SBP                    | 0.19             | <b>0.86</b> |              |             | 0.17                  | 0.24        |             | <b>0.88</b>  | SBP                    | 0.14             |              | <b>0.88</b>  |             | 0.14                  | <b>0.92</b> |              |             |
| DBP                    |                  | <b>0.72</b> |              |             | 0.10                  | 0.11        |             | <b>0.73</b>  | DBP                    |                  |              | <b>0.76</b>  |             |                       | <b>0.74</b> |              |             |
| WAIST                  | <b>1.00</b>      |             |              |             | <b>0.73</b>           | <b>0.65</b> |             |              | WAIST                  | <b>0.86</b>      | 0.21         |              | <b>0.47</b> | <b>0.88</b>           |             | 0.20         | 0.38        |
| WHR                    | <b>0.72</b>      |             | 0.17         |             | <b>1.00</b>           |             |             |              | WHR                    | <b>0.40</b>      | 0.27         |              | <b>0.69</b> | 0.38                  |             | 0.24         | <b>0.89</b> |
| %BF                    | <b>0.77</b>      |             |              | -0.22       | <b>0.45</b>           | <b>0.67</b> | -0.11       |              | %BF                    | <b>0.78</b>      | 0.17         |              | 0.16        | <b>0.79</b>           |             | 0.16         | 0.12        |

† Variables were adjusted for age and center within ethnicity and gender (see Material and Methods)

† GLUC negative loadings are result of inverse squared power transformation of the original GLUC † Loadings ≥ 0.4 are in bold
